# Supplementary material for: Functional Characterization of Phalaenopsis aphrodite Flowering Genes PaFT1 and PaFD
Source: PubMed Central journal article supplement (PMC4552788; doi:10.1371/journal.pone.0134987), 2015-08-28
Supplement: pone.0134987.s001.pdf [file pone.0134987.s001.pdf]

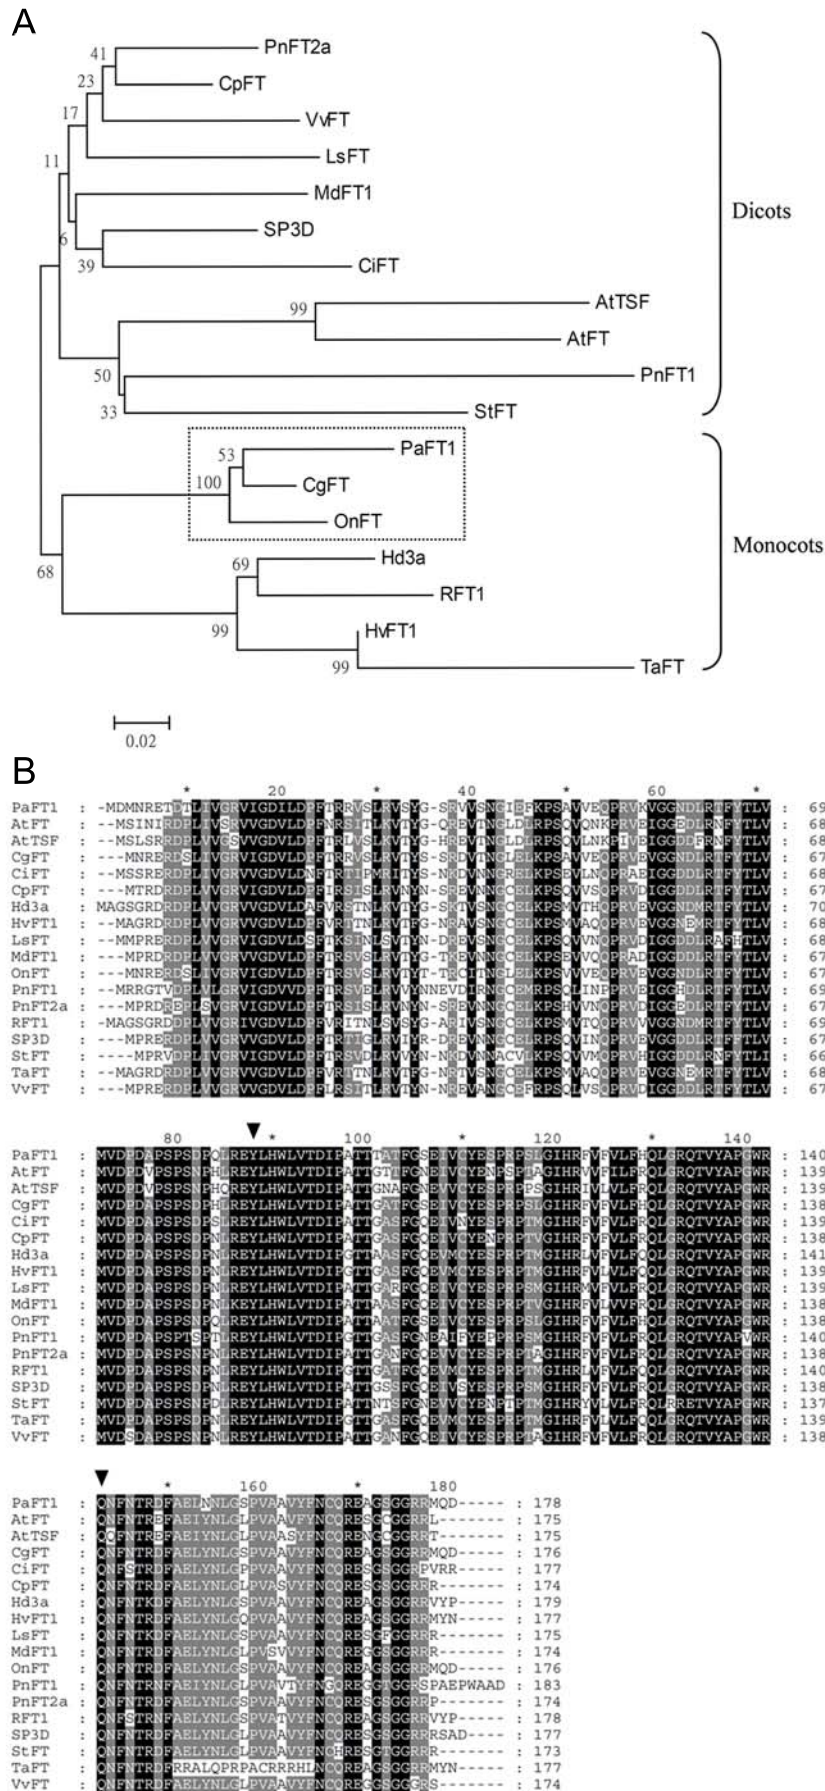

Figure S1. A detailed phylogenetic tree of FT proteins from various plants and proteins used for the construction of the tree.
