# Supplementary material for: Functional Characterization of Phalaenopsis aphrodite Flowering Genes PaFT1 and PaFD
Source: PubMed Central journal article supplement (PMC4552788; doi:10.1371/journal.pone.0134987), 2015-08-28
Supplement: pone.0134987.s003.pdf [file pone.0134987.s003.pdf]

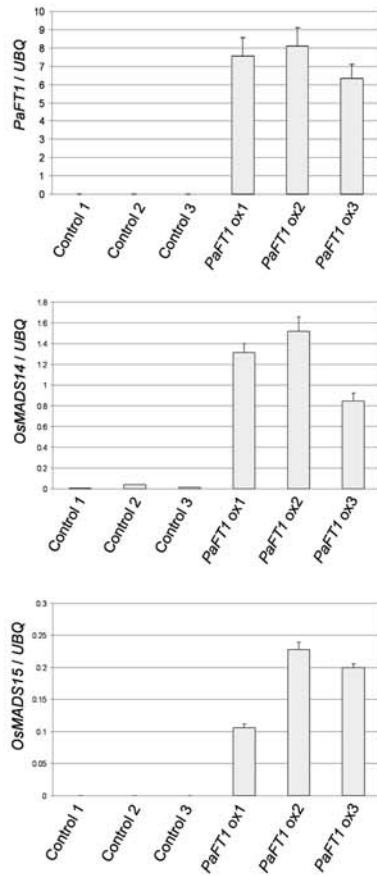

Figure S3. Expression level of *PaFT1*, *OsMADS14* and *OsMADS15* in transgenic rice plants expressing *PaFT1*.
