# Supplementary material for: Functional Characterization of Phalaenopsis aphrodite Flowering Genes PaFT1 and PaFD
Source: PubMed Central journal article supplement (PMC4552788; doi:10.1371/journal.pone.0134987), 2015-08-28
Supplement: pone.0134987.s005.pdf [file pone.0134987.s005.pdf]

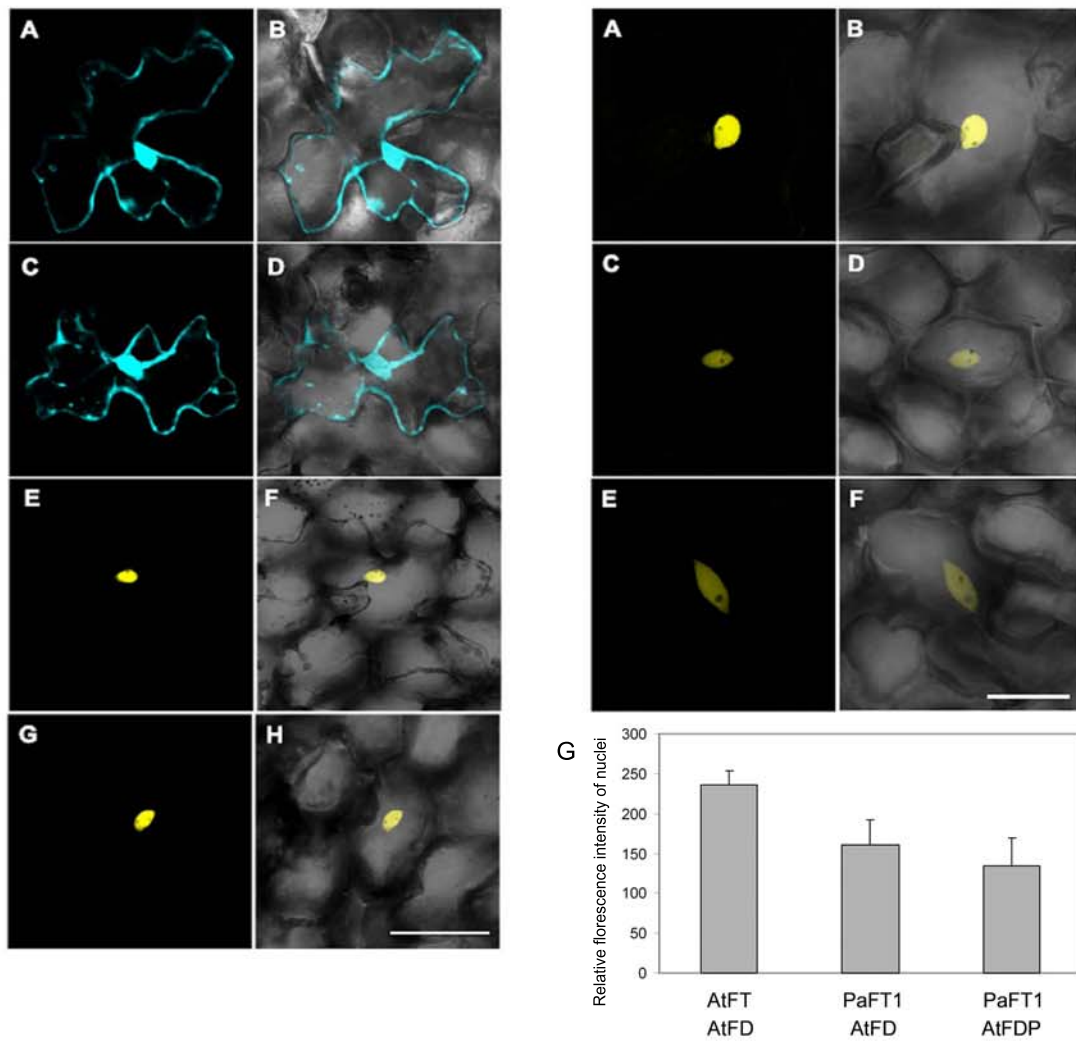

Figure S5. Subcellular localization of FT, FD and FDP proteins and the interaction between them in plant cells.
