# Supplementary material for: Functional Characterization of Phalaenopsis aphrodite Flowering Genes PaFT1 and PaFD
Source: PubMed Central journal article supplement (PMC4552788; doi:10.1371/journal.pone.0134987), 2015-08-28
Supplement: pone.0134987.s008.pdf [file pone.0134987.s008.pdf]

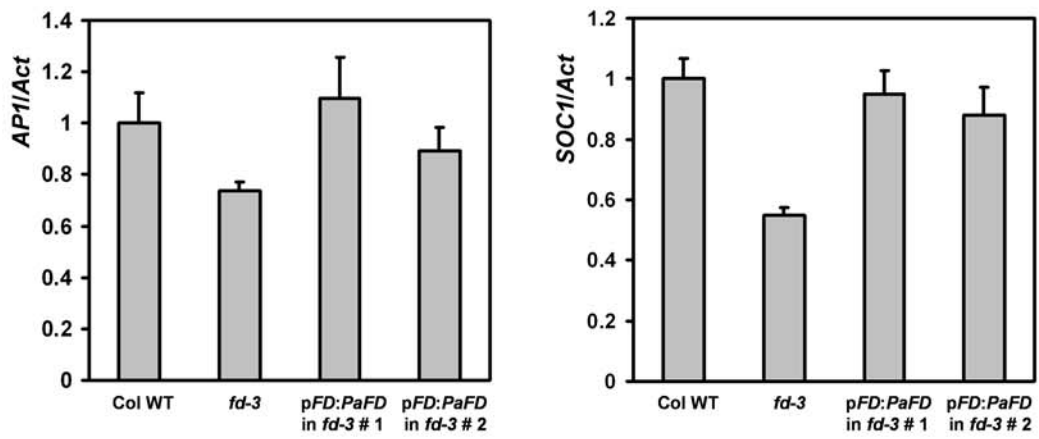

Figure S8. Expression of Arabidopsis *AP1* and *SOC1* genes in pFD:PaFD *fd-3* plants compared with WT and *fd-3* mutant plants.
