# Supplementary material for: Functional Characterization of Phalaenopsis aphrodite Flowering Genes PaFT1 and PaFD
Source: PubMed Central journal article supplement (PMC4552788; doi:10.1371/journal.pone.0134987), 2015-08-28
Supplement: pone.0134987.s009.pdf [file pone.0134987.s009.pdf]

A

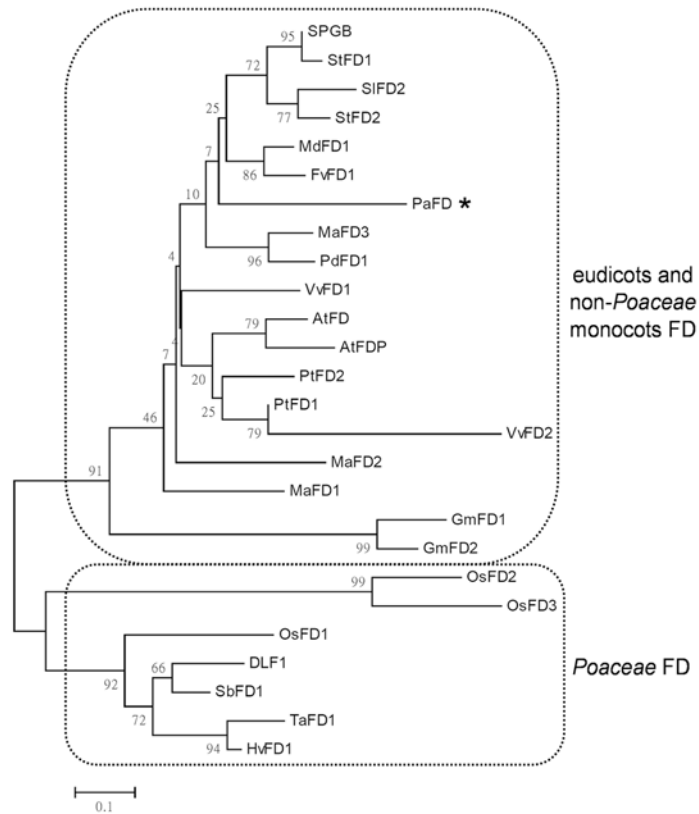

B

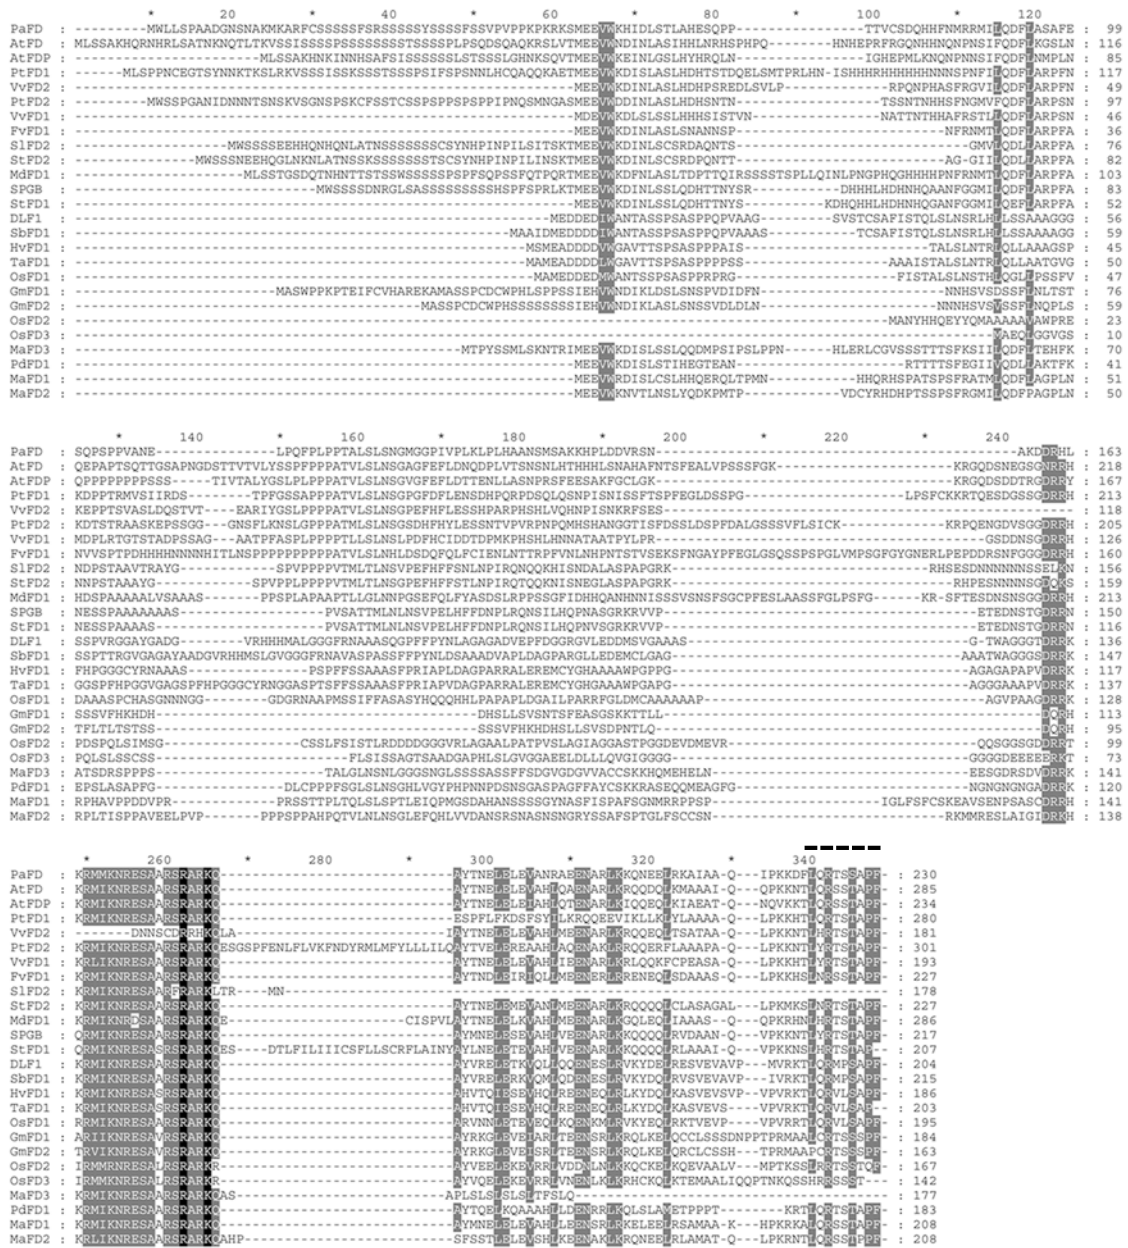

Figure S9. PaFD and FD proteins from various plant species.
