# Supplementary material for: Functional Characterization of Phalaenopsis aphrodite Flowering Genes PaFT1 and PaFD
Source: PubMed Central journal article supplement (PMC4552788; doi:10.1371/journal.pone.0134987), 2015-08-28
Supplement: pone.0134987.s011.pdf [file pone.0134987.s011.pdf]

Table S1. Primers used in this study.

| Primers | Sequence                                                              | Purpose  |
|---------|-----------------------------------------------------------------------|----------|
| JIT267  | 5' TCCGACATAGAAGACATTATAGC 3'                                         | PaFT1    |
| JIT268  | 5' CAACATTCGGCAGTGAAATAGTG 3'                                         | qPCR     |
| JIT639  | 5' AGGCAATAGCTGCTCAGATTC 3'                                           | PaFD     |
| JIT640  | 5' TCTGGAGAGACAGATCTAC 3'                                             | qPCR     |
| JIT578  | 5' CTAGCGGAAACGCGACAGA 3'                                             | PaACT    |
| JIT579  | 5' CCAAGGGAAGCCAAAATGC 3'                                             | qPCR     |
| JIT258  | 5' CACTCTTGTTCATGGTAGATCCAGATG 3'                                     | PaFT1    |
| JIT262  | 5' CAATCTTGCATCCTTCTCCACCG 3'                                         | RT-PCR   |
| JIT619  | 5' ATGGAAGAAGTCTGGAACACATTGAC 3'                                      | PaFD     |
| JIT620  | 5' TTAAAATGGCGCGGATGAAGTCTCTG 3'                                      | RT-PCR   |
| JIT10F  | 5' GGCTAACAGAGAGAAGATGACC 3'                                          | PaACT    |
| JIT10R  | 5' AATAGACCCCTCCAATCCAGAC 3'                                          | RT-PCR   |
| JIT588  | 5' GATCGCCAGTCGGTTGATTT 3'                                            | PaUBQ    |
| JIT589  | 5' GAAGCCTACGGCCATCGA 3'                                              | qPCR     |
| JIT1082 | 5' CCTGAGGTAGCCGTAGAAGCTC 3'                                          | PaSOC1-1 |
| JIT1083 | 5' TATGGAGATGTAACGGTCAC 3'                                            | qPCR     |
| JIT1077 | 5' GCAAAGTTAGATGGCGAAAGAAC 3'                                         | PaSOC1-2 |
| JIT1078 | 5' ACATTTGATTGTTATGCATGCCA 3'                                         | qPCR     |
| JIT1079 | 5' AGGAGATGGTTCCCAATGTG 3'                                            | PaSOC1-3 |
| JIT1080 | 5' CGGGCCATCCTACATACAGTTC 3'                                          | qPCR     |
| JIT255  | 5' AGCTGCAGAAAACGAGAAGCTCTCTG 3'                                      | AtSOC1   |
| JIT256  | 5' GGGTACTCTCTTCATCACCTCTTCC 3'                                       | qPCR     |
| JIT604  | 5' TCGTAACTCCTCCAGAGATGGCTTTG 3'                                      | AtFUL    |
| JIT605  | 5' GTTCTACTCGTTCGTAGTGGTAGGACGTAACATC 3'                              | qPCR     |
| JIT515  | 5' ACAATATGCCTCCCCCTC 3'                                              | AtAP1    |
| JIT516  | 5' CTTCTTGATACAGACCACCC 3'                                            | qPCR     |
| JIT590  | 5' GGTAACATTGTGCTCAGTGGTGG 3'                                         | AtActin  |
| JIT591  | 5' AACGACCTTAATCTTCATGCTGC 3'                                         | qPCR     |
| JIT414  | 5' GATCTTTGCCGAAAACAATTGGAGGATGGT 3'                                  | AtUBQ10  |
| JIT415  | 5' CGACTTGTCAATTAGAAAGAAAGAGATAACAGG 3'                               | RT-PCR   |
| JIT557  | 5' CAAGGACTTGACATTGAAGAGCTTCA 3'                                      | AtSVP    |
| JIT558  | 5' TGTCGGAGCTCTCGGAGTCAACAG 3'                                        | RT-PCR   |
| JIT562  | 5' GGGGACAAGTTTGTACAAAAAAGCAGGCTGCGTCCGTCTGTAGAAACCCCAACCCGTGA 3'     | GUS      |
| JIT563  | 5' GGGGACCACCTTTGTACAAAGAAAGCTGGGTGTTCCGGTATAAAGACTTCGCGCTGATACCAG 3' | VIGS     |
| JIT427  | 5' GGGGACCACCTTTGTACAAAGAAAGCTGGGTACTCTCGGCTGCTCCACTACTGCCGAG 3'      | PaFT1    |
| JIT572  | 5' GGGGACAAGTTTGTACAAAAAAGCAGGCTGCATGGATATGAATAGAGAGACGGACAC 3'       | VIGS     |
| JIT641  | 5' GGGGACAAGTTTGTACAAAAAAGCAGGCTGCATGTGGTCCCTATCTCCTGCCGCCGATG 3'     | PaFD     |
| JIT827  | 5' GGGGACCACCTTTGTACAAAGAAAGCTGGGTGACTTCTCCATACTTTTACGCTTTG 3'        | VIGS     |
| JIT600  | 5' TCCATCTGGCATCTCTCAG 3'                                             | OsACT    |
| JIT601  | 5' GTACCCGCATCAGGCATCTG 3'                                            | RT-PCR   |
| JIT661  | 5' AACCAGCTGAGGCCAAGA 3'                                              | OsUBQ    |
| JIT662  | 5' ACGATTGATTTAACCAGTCCATGA 3'                                        | qPCR     |
| JIT23   | 5' CGAGTGAAGATCCCTTTCTTGTTC 3'                                        | GUS      |
| JIT7    | 5' CGCAAGACTGTAACCACGC 3'                                             | RT-PCR   |
